# Supplementary material for: Comparative Assessment of Supervisory Control Algorithms for a Plug-In Hybrid Electric Vehicle
Source: MDPI journal article supplement (doi:10.3390/en16031497), 2023-02-02
Supplement: s1 [file s1]

Archive with 1 entries (1 files):
- energies-2161524-supplementary.pdf
