# Supplementary figures and images for: Comparative Assessment of Supervisory Control Algorithms for a Plug-In Hybrid Electric Vehicle
Source: MDPI journal article supplement (doi:10.3390/en16031497), 2023-02-02

## Supplemental Information

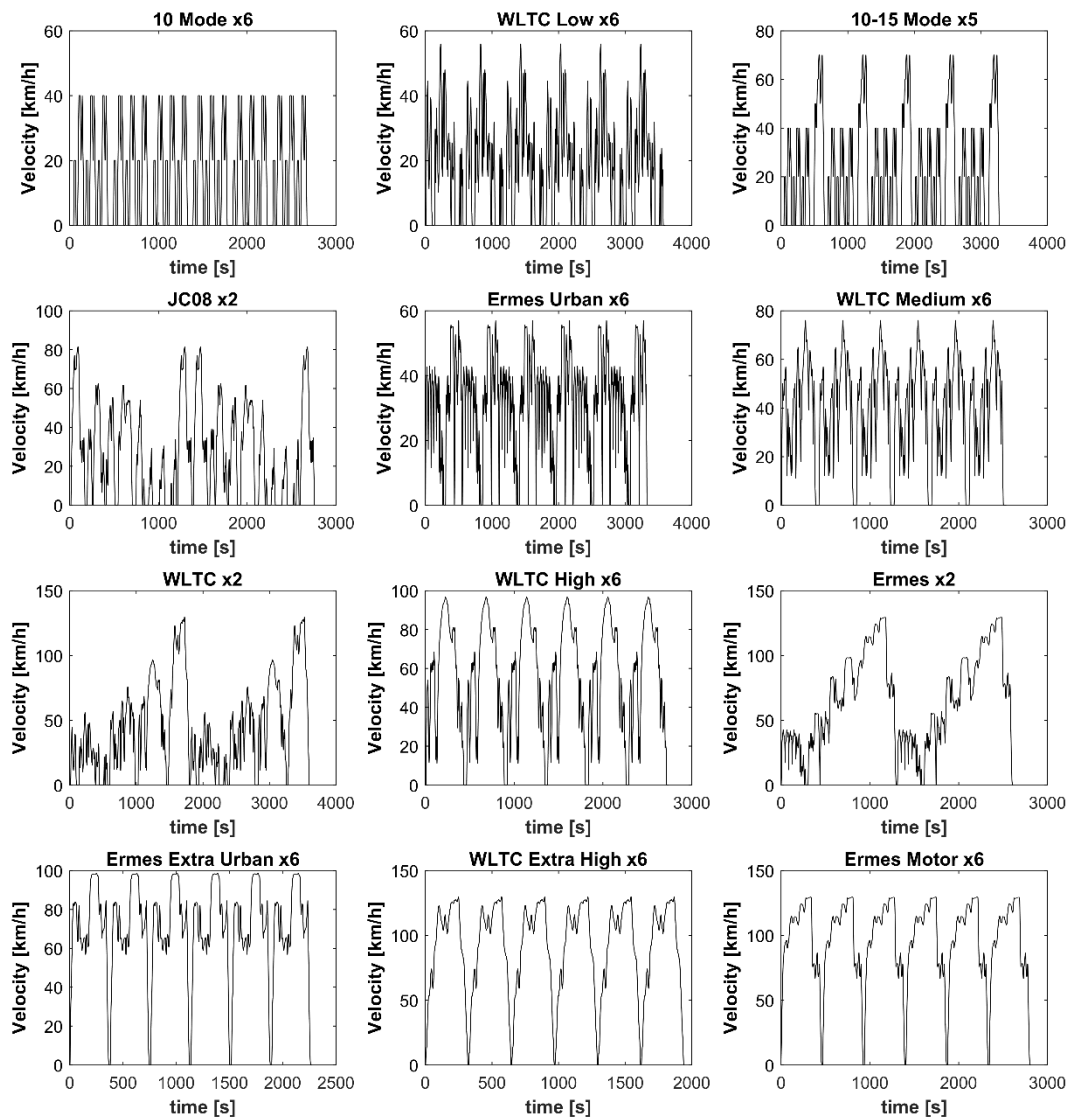

Figure S1. Examined Cycles

Supplement: s1 [file s1]
